# Supplementary material for: NH2-Modified UiO-66: Structural Characteristics and Functional Properties
Source: MDPI journal article supplement (doi:10.3390/molecules28093916), 2023-05-05
Supplement: s1 [file s1]

Supplementary Materials

# NH<sub>2</sub>-Modified UiO-66: Structure, Textural Characteristics, and Functional Properties

Konstantin L. Timofeev <sup>1</sup>, Sergei A. Kulinich <sup>2</sup>, Tamara S. Kharlamova <sup>1,\*</sup>

<sup>1</sup> Tomsk State University, Lenin Ave. 36, 634050 Tomsk, Russia

<sup>2</sup> Research Institute of Science & Technology, Tokai University, Hiratsuka 259-1292, Kanagawa, Japan

\* Correspondence: skulinich@tokai-u.jp (S.A.K.); kharlamova83@gmail.com (T.S.K)

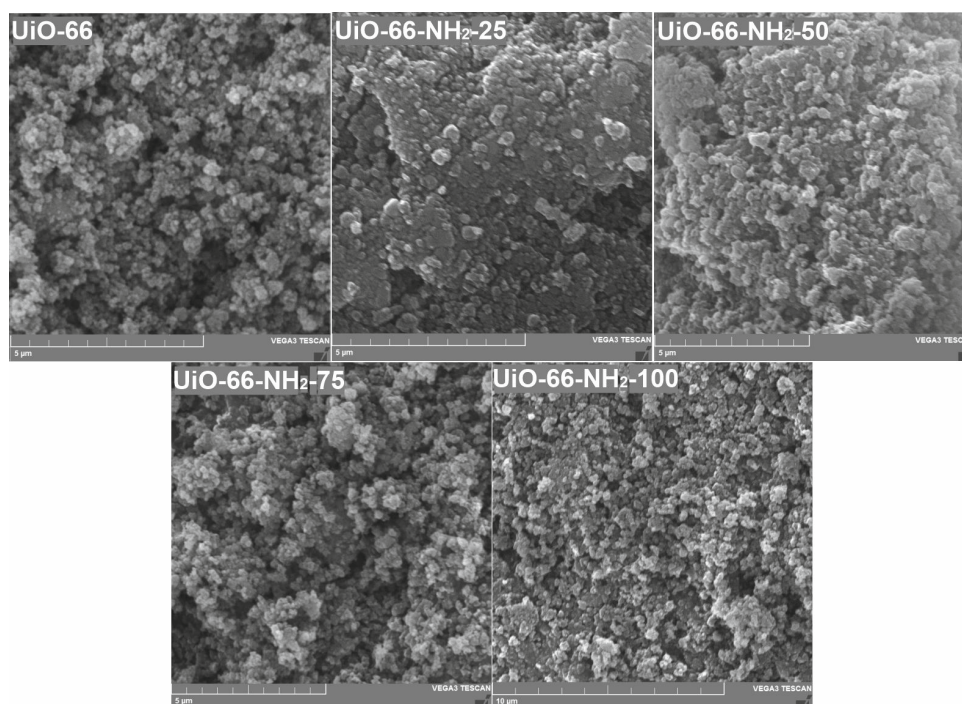

**Figure S1.** Typical SEM images of UiO-66 and UiO-66-NH<sub>2</sub>-75 samples.

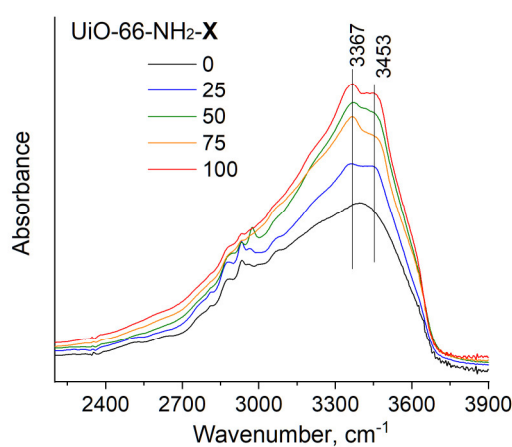

**Figure S2.** IR spectra for UiO-66 (X=0) and UiO-66-NH<sub>2</sub>-X samples in sub-region 2600–3200 cm<sup>-1</sup>.

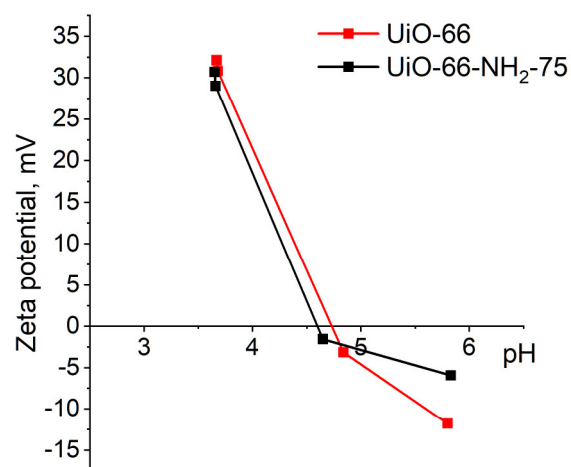

**Figure S3.** Zeta potential dependences for UiO-66 and UiO-66-NH<sub>2</sub>-75 samples on pH.
